# Supplementary material for: Characterization of three Stenotrophomonas strains isolated from different ecosystems and proposal of Stenotrophomonas mori sp. nov. and Stenotrophomonas lacuserhaii sp. nov
Source: PubMed Central journal article supplement (PMC9797726; doi:10.3389/fmicb.2022.1056762), 2022-12-15
Supplement: Data_Sheet_3.pdf [file Data_Sheet_3.pdf]

**Characterization of three *Stenotrophomonas* strains and proposal of *Stenotrophomonas mori* sp. nov., and *Stenotrophomonas lacuserhailii* sp. nov.**

**Yang Deng<sup>1,2</sup>, Xue-Fei Han<sup>1,2</sup>, Zhu-Ming Jiang<sup>1,2</sup>, Li-Yan Yu<sup>1</sup>, Yong Li<sup>3</sup>, Yu-Qin Zhang<sup>1,2\*</sup>**

<sup>1</sup>Institute of Medicinal Biotechnology, Chinese Academy of Medical Sciences & Peking Union Medical College, Beijing 100050, P. R. China

<sup>2</sup>State Key Laboratory of Dao-di Herb, Beijing, 100700, P. R. China

<sup>3</sup>Faculty of Geosciences and Environmental Engineering, Southwest Jiaotong University, Chengdu 610031, PR China.

\* Author for correspondence:

Yu-Qin Zhang

Tel: +86-10-83167110

Fax: +86-10-83167110

E-Mail: [yzhang@imb.pumc.edu.cn](mailto:yzhang@imb.pumc.edu.cn)

**Keywords:** *Stenotrophomonas mori*, *Stenotrophomonas lacuserhailii*, genome, ANI, dDDH, IAA

**Abbreviations:** DPG, diphosphatidylglycerol; PG, phosphatidylglycerol; PE, phosphatidylethanolamine; ANI, average nucleotide identity; dDDH, digital DNA-DNA hybridization; IAA, indole-3-acetic acid; MALDI-TOF MS, matrix-assisted laser desorption/ionization time-of-flight mass spectrometry.

**Supplementary Figure S1. Transmission electron micrographs of motile cells of strains CPCC 101365<sup>T</sup> and CPCC 101269<sup>T</sup>.**

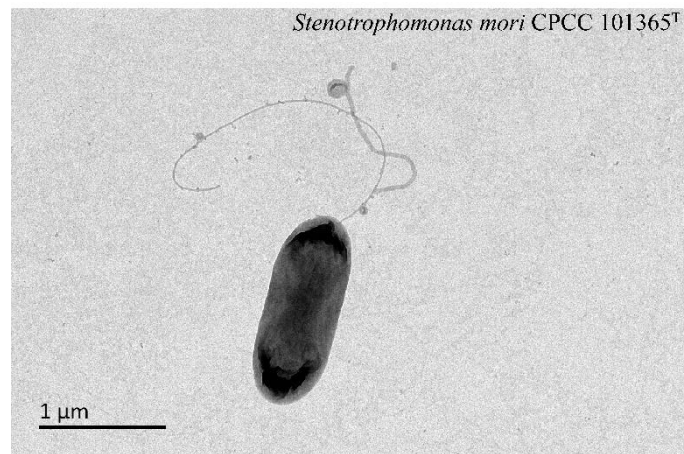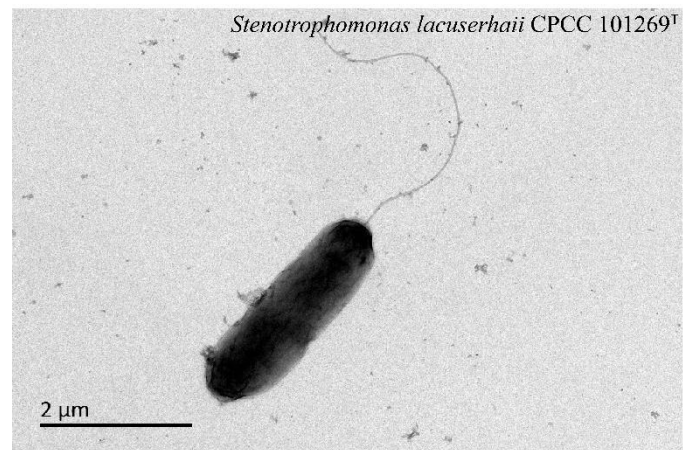

**Supplementary Figure S2. Polar lipid profiles of strains CPCC 101365<sup>T</sup>, CPCC 101269<sup>T</sup>, and CPCC 101426 after separation by two-dimensional TLC.**

(a) Detection by spraying with molybdato-phosphoric acid reagent. (b) Detection by spraying with ninhydrin stain reagent. (c) Detection by spraying with molybdenum blue stain reagent. (d) Detection by spraying with p-anisaldehyde stain reagent.

DPG, diphosphatidylglycerol; PG, phosphatidylglycerol; PE, phosphatidylethanolamine; GPL, unidentified glycerophospholipid; PL, unidentified phospholipid.

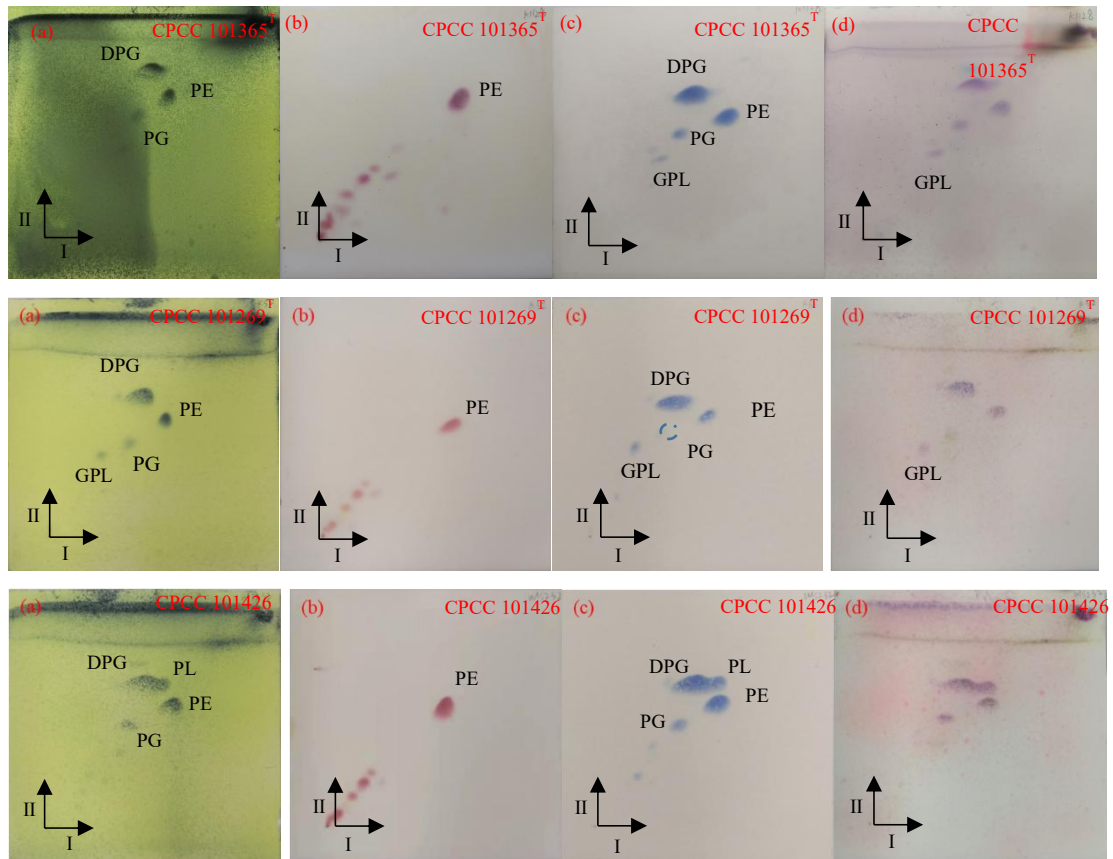

**Supplementary Figure S3. Whole-genome phylogenetic tree generated for strains CPCC 101365<sup>T</sup>, CPCC 101269<sup>T</sup>, CPCC 101426, and other representatives of the family *Lysobacteraceae*.**

The phylogenetic tree was inferred with the FastME algorithm using GBDP distances calculated from genome sequences. Branch lengths are scaled based on the GBDP distance formula d5. Numbers above branches show GBDP pseudo-bootstrap support values from 100 replicates.

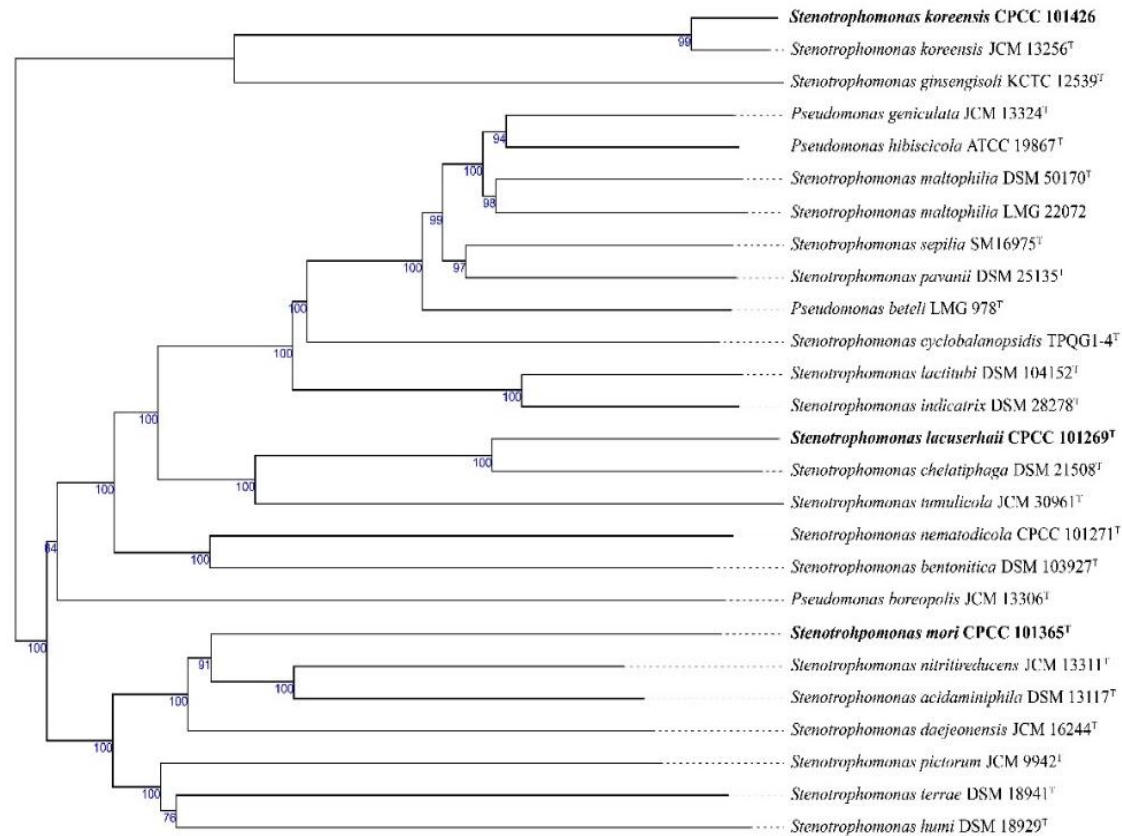

**Supplementary Figure S4. MALDI-TOF MS spectra profiles of strains CPCC 101365<sup>T</sup>, CPCC 101269<sup>T</sup>, CPCC 101426, and closely related *Stenotrophomonas* strains.**

The name of each strain was labeled on the upper right corner of each spectrum. (a) MALDI-TOF MS spectra profiles of strains CPCC 101365<sup>T</sup>, CPCC 101269<sup>T</sup>, CPCC 101426, and their closely related *Stenotrophomonas* strains; (b) MALDI-TOF MS profiles of strain CPCC 101365<sup>T</sup> compared with *Stenotrophomonas acidaminiphila* DSM 13117<sup>T</sup> and *Stenotrophomonas nitritireducens* JCM 13311<sup>T</sup>, with the detail of peptide peaks of 6,429.9 Da and 11,254.6 Da in the spectra of strain CPCC 101365<sup>T</sup>, *S. nitritireducens* JCM 13311<sup>T</sup> and *S. acidaminiphila* DSM 13117<sup>T</sup>; (c) MALDI-TOF MS profiles of strain CPCC 101269<sup>T</sup> compared with *Stenotrophomonas chelatiphaga* DSM 21508<sup>T</sup> and *Stenotrophomonas tumulicola* JCM 30961<sup>T</sup>, with the detail of the peptide peak of 9,812.5 Da in the spectra of strain CPCC 101269<sup>T</sup>, *Stenotrophomonas chelatiphaga* DSM 21508<sup>T</sup> and *Stenotrophomonas tumulicola* JCM 30961<sup>T</sup>.

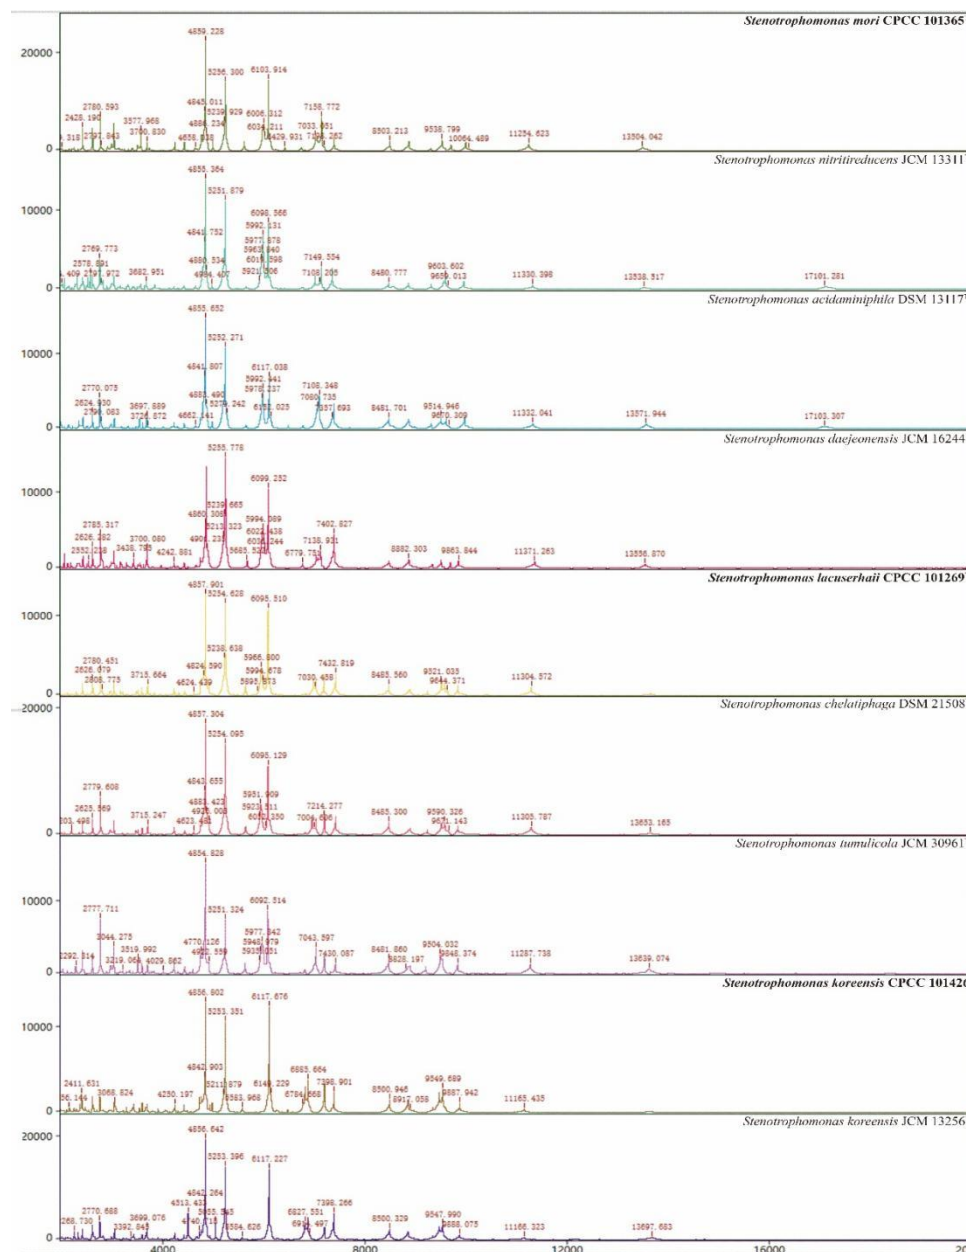

(a)

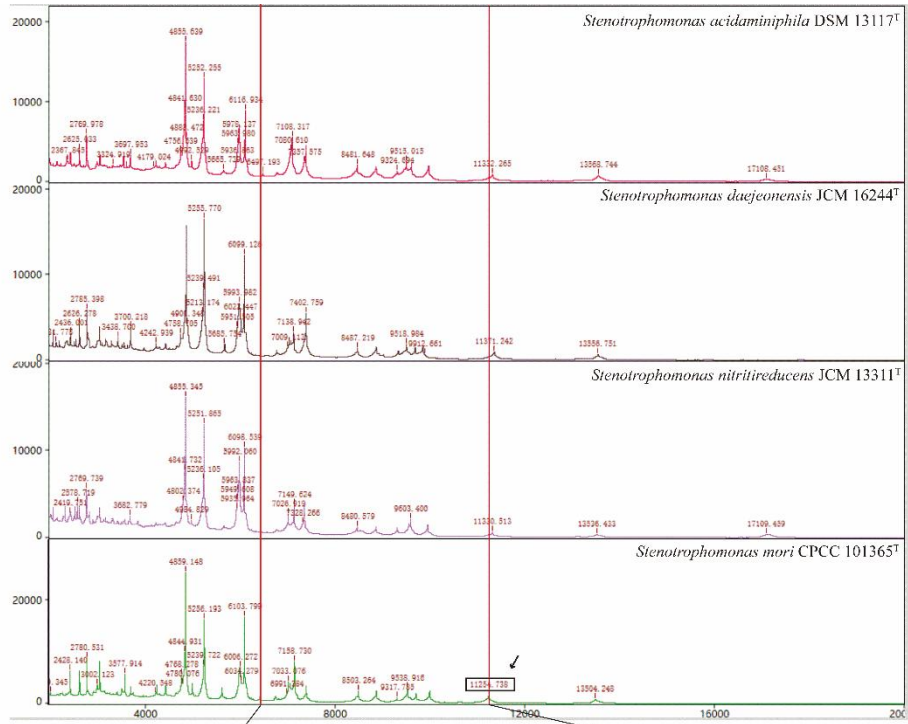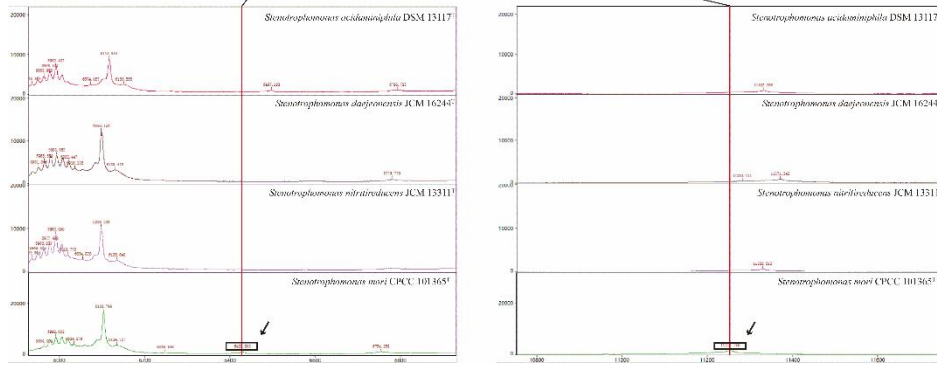

(b)

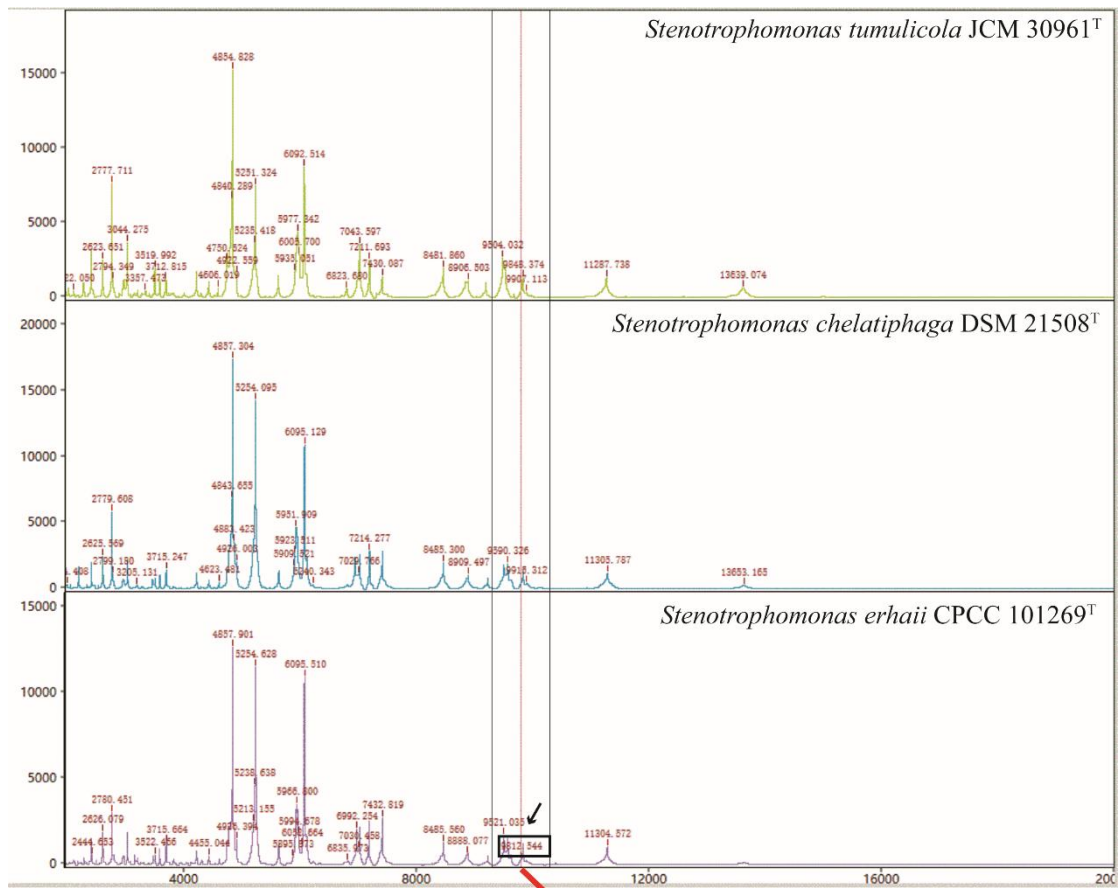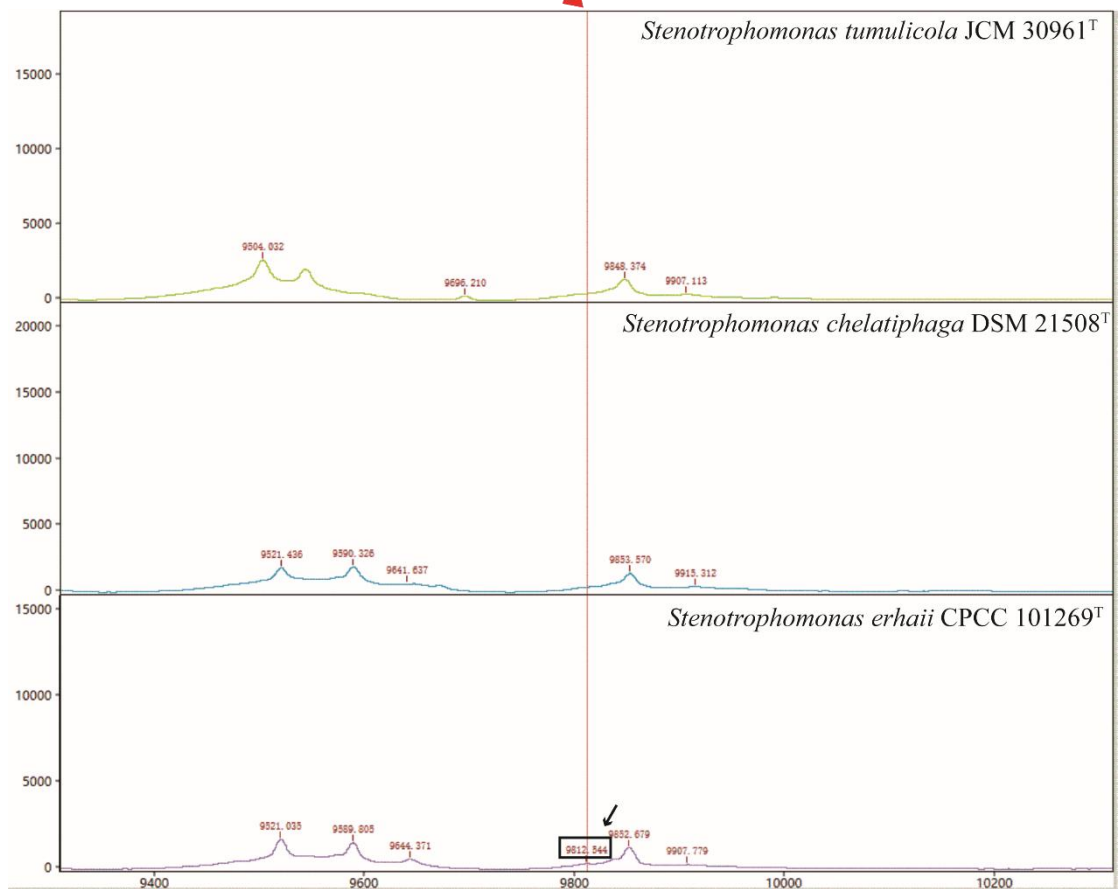

(c)

**Supplementary Figure S5. Antibiotic resistance genes predicted from the genomes of CPCC 101365<sup>T</sup>, CPCC 101269<sup>T</sup>, CPCC 101426, *S. maltophilia* DSM 50170<sup>T</sup>, and *S. maltophilia* K279a.**

Strain 1, CPCC 101365<sup>T</sup>; Strain 2, CPCC 101269<sup>T</sup>; Strain 3, CPCC 101426; Strain 4, *S. maltophilia* DSM 50170<sup>T</sup>; Strain 5, *S. maltophilia* K279a.

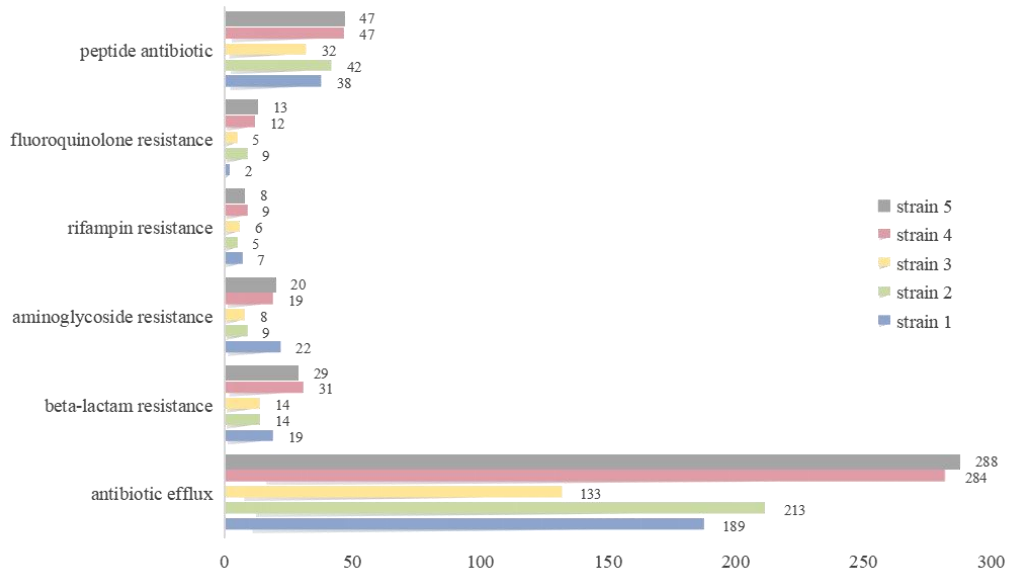





|                                                                           |     |     |      |     |             |      |     |     |     |
|---------------------------------------------------------------------------|-----|-----|------|-----|-------------|------|-----|-----|-----|
| Antesio-C <sub>15:0</sub>                                                 | 9.5 | 5.9 | 4.6  | 3.9 | <b>16.6</b> | 14.8 | 8.8 | 4.7 | 6.1 |
| Antesio-C <sub>17:0</sub>                                                 |     |     |      |     |             |      | -   | -   | 0.5 |
| <b>Hydroxy fatty acids</b>                                                |     |     |      |     |             |      |     |     |     |
| C <sub>11:0</sub> 3OH                                                     | 0.5 | 0.5 | -    | -   | -           | -    | -   | 0.9 | 0.7 |
| C <sub>12:0</sub> 3OH                                                     | 1.2 | 1.7 | 1.1  | 0.8 | 1.9         | 2.5  | 1.5 | 0.6 | -   |
| C <sub>13:0</sub> 2OH                                                     | 1.1 | 1.1 |      | 0.5 | 0.9         | 1.5  | 0.5 | -   | -   |
| Iso-C <sub>11:0</sub> 3OH                                                 | 2.8 | 3.9 | 0.5  | 3.2 | 1.7         | 2.7  | 1.7 | 2.7 | 3.1 |
| Iso-C <sub>12:0</sub> 3OH                                                 | 1.7 | 1.8 | 5.8  | 0.5 | -           | 1.0  | -   | 0.7 | -   |
| Iso-C <sub>13:0</sub> 3OH                                                 | 2.3 | 2.9 | 2.9  | 2.2 | 1.5         | 2.5  | 1.9 | 1.5 | 1.6 |
| <b>Others</b>                                                             |     |     |      |     |             |      |     |     |     |
| Sum In Feature 3 (C <sub>16:1</sub> ω7c/C <sub>16:1</sub> ω6c)            | 5.1 | -   | 2.0  | 3.4 | 5.1         | 6.7  | 1.7 | 2.5 | 1.3 |
| Sum In Feature 8 (C <sub>18:1</sub> ω7c/C <sub>18:1</sub> ω6c)            | -   | -   | -    | -   | 0.8         | -    | 1.0 | -   | -   |
| Sum In Feature 9 (iso- C <sub>17:1</sub> ω9c/C <sub>16:0</sub> 10-methyl) | 5.3 | 2.5 | 10.2 | 4.4 | 3.3         | 1.9  | 1.8 | 4.2 | 5.4 |

**Supplementary Table S2. Pairwise comparison of the 16S rRNA gene sequences of strains CPCC 101365<sup>T</sup>, CPCC 101269<sup>T</sup>, CPCC 101426, and other closely related strains.**

1, CPCC 101365<sup>T</sup>; 2, *Stenotrophomonas nitritireducens* JCM 13311<sup>T</sup>; 3, *Stenotrophomonas acidaminiphila* DSM 13117<sup>T</sup>; 4, *Stenotrophomonas daejeonensis* JCM 16244<sup>T</sup>; 5, CPCC 101269<sup>T</sup>; 6, *Stenotrophomonas chelatiphaga* DSM 21508<sup>T</sup>; 7, *Stenotrophomonas tumulicola* JCM 30961<sup>T</sup>; 8, CPCC 101426; 9, *Stenotrophomonas koreensis* JCM 13256<sup>T</sup>; 10, *Stenotrophomonas ginsengisoli* KCTC 12539<sup>T</sup>.

16S rRNA gene sequence similarities (%) > 98.65 % were highlighted in red.

| Species | 1     | 2     | 3     | 4     | 5     | 6     | 7     | 8     | 9     | 10    |
|---------|-------|-------|-------|-------|-------|-------|-------|-------|-------|-------|
| 1       | 100.0 |       |       |       |       |       |       |       |       |       |
| 2       | 99.1  | 100.0 |       |       |       |       |       |       |       |       |
| 3       | 98.8  | 98.7  | 100.0 |       |       |       |       |       |       |       |
| 4       | 98.0  | 97.0  | 98.4  | 100.0 |       |       |       |       |       |       |
| 5       | 97.3  | 97.3  | 97.3  | 97.1  | 100.0 |       |       |       |       |       |
| 6       | 97.4  | 97.3  | 97.1  | 96.6  | 99.9  | 100.0 |       |       |       |       |
| 7       | 97.8  | 97.4  | 97.3  | 96.6  | 99.4  | 99.4  | 100.0 |       |       |       |
| 8       | 97.1  | 97.1  | 97.2  | 96.3  | 97.3  | 97.4  | 97.6  | 100.0 |       |       |
| 9       | 97.2  | 97.2  | 97.3  | 96.4  | 97.6  | 97.5  | 97.6  | 99.8  | 100.0 |       |
| 10      | 96.7  | 97.1  | 96.7  | 96.7  | 97.6  | 97.5  | 97.6  | 98.3  | 98.4  | 100.0 |

**Supplementary Table S3. Genome features of strains CPCC 101365<sup>T</sup>, CPCC 101269<sup>T</sup>, CPCC 101426, and other closely related strains.**

Strains: 1, CPCC 101365<sup>T</sup>; 2, *Stenotrophomonas nitritireducens* JCM 13311<sup>T</sup>; 3, *Stenotrophomonas acidaminiphila* DSM 13117<sup>T</sup>; 4, *Stenotrophomonas daejeonensis* JCM 16244<sup>T</sup>; 5, CPCC 101269<sup>T</sup>; 6, *Stenotrophomonas chelatiphaga* DSM 21508<sup>T</sup>; 7, *Stenotrophomonas tumulicola* JCM 30961<sup>T</sup>; 8, CPCC 101426; 9, *Stenotrophomonas koreensis* JCM 13256<sup>T</sup>.

\*Data were derived from this study except: <sup>a</sup>, Finkmann et al., 2000; <sup>b</sup>, Assih et al., 2002; <sup>c</sup>, Lee et al., 2011; <sup>d</sup>, Kaparullina et al., 2009; <sup>e</sup>, Handa et al., 2016; <sup>f</sup>, Yang et al., 2006.

| Characteristic   | 1             | 2                | 3                | 4                                | 5                     | 6                          | 7                    | 8                 | 9                    |
|------------------|---------------|------------------|------------------|----------------------------------|-----------------------|----------------------------|----------------------|-------------------|----------------------|
| Isolation source | Mulberry root | Ammonia-supplied | Upflow anaerobic | Sewage water sample <sup>c</sup> | Fresh water reservoir | Sewage sludge <sup>d</sup> | Major contaminant of | Desert sandy soil | Compost <sup>f</sup> |

|                                                |                     | biofilters <sup>a</sup> | sludge blanket <sup>b</sup> |                     |                     |                     | stone chamber<br>interior <sup>c</sup> |                     |                     |  |
|------------------------------------------------|---------------------|-------------------------|-----------------------------|---------------------|---------------------|---------------------|----------------------------------------|---------------------|---------------------|--|
| No. of contigs                                 | 11                  | 95                      | 126                         | 124                 | 27                  | 28                  | 26                                     | 16                  | 58                  |  |
| N50 Length (bp)                                | 468,441             | 167,790                 | 71,728                      | 46,611              | 381,161             | 227,000             | 313,801                                | 521,188             | 188,329             |  |
| Genome size<br>(Mbp)                           | 3.4                 | 4.0                     | 3.9                         | 3.3                 | 4.0                 | 4.0                 | 4.3                                    | 3.1                 | 3.0                 |  |
| G+C (%)                                        | 70.2                | 68.3                    | 68.8                        | 68.6                | 66.4                | 66.9                | 65.6                                   | 66.2                | 66.1                |  |
| No. of CDS                                     | 2,860               | 3,490                   | 3,554                       | 2,959               | 3,439               | 3,378               | 3,774                                  | 2,706               | 2,598               |  |
| DDBJ/EMBL/GenBank accession                    | JAIKTS000000        | LDJG00000000            | LDJO00000000                | LDJP00000000        | JACHQY000000        | LDJK00000000        | JACGXS000000                           | JACIUV000000        | LDJH00000000        |  |
| number of draft<br>genome                      | 000                 |                         |                             |                     | 000                 |                     | 000                                    | 000                 |                     |  |
| GenBank/RefSeq<br>assembly<br>accession number | GCA_0235563<br>35.1 | GCA_0014314<br>25.1     | GCA_0014315<br>95.1         | GCA_0014315<br>05.1 | GCA_01459629<br>5.1 | GCA_0014315<br>35.1 | GCA_01411721<br>5.1                    | GCA_01414581<br>5.1 | GCA_0014315<br>25.1 |  |



---

|                                                  |              |      |      |      |      |      |      |      |      |      |      |      |      |      |      |      |      |      |
|--------------------------------------------------|--------------|------|------|------|------|------|------|------|------|------|------|------|------|------|------|------|------|------|
| JCM 16244 <sup>T</sup>                           |              |      |      |      |      |      |      |      |      |      |      |      |      |      |      |      |      |      |
| <i>S. ginsengisoli</i>                           | LDJM00000000 | 77.4 | 76.5 | 84.0 | 77.9 | 77.0 | 76.9 | 77.9 | 100. | 0    |      |      |      |      |      |      |      |      |
| KCTC 12539 <sup>T</sup>                          |              |      |      |      |      |      |      |      |      |      |      |      |      |      |      |      |      |      |
| <i>S. humi</i> DSM 18929 <sup>T</sup>            | LDJI00000000 | 81.3 | 78.5 | 76.5 | 82.2 | 79.4 | 78.5 | 82.4 | 76.6 | 100. | 0    |      |      |      |      |      |      |      |
| <i>S. indicatrix</i> DSM 28278 <sup>T</sup>      | PEJS00000000 | 80.0 | 82.2 | 76.6 | 80.0 | 81.5 | 82.3 | 80.3 | 76.8 | 78.9 | 100. | 0    |      |      |      |      |      |      |
| <i>S. koreensis</i> JCM 13256 <sup>T</sup>       | LDJH00000000 | 77.8 | 76.5 | 97.7 | 78.0 | 76.9 | 76.7 | 77.9 | 84.6 | 76.5 | 76.6 | 100. | 0    |      |      |      |      |      |
| <i>S. lactitubi</i> DSM 104152 <sup>T</sup>      | PHQX00000000 | 79.4 | 82.1 | 76.7 | 79.8 | 81.5 | 82.3 | 80.0 | 76.6 | 78.5 | 93.5 | 76.4 | 100. | 0    |      |      |      |      |
| <i>S. maltophilia</i> DSM 50170 <sup>T</sup>     | BCUI00000000 | 79.8 | 82.2 | 77.1 | 80.3 | 81.8 | 82.3 | 80.4 | 76.8 | 78.9 | 86.9 | 76.9 | 87.0 | 100. | 0    |      |      |      |
| <i>S. nitritireducens</i> JCM 13311 <sup>T</sup> | LDJG00000000 | 86.2 | 79.7 | 78.1 | 90.0 | 81.1 | 79.9 | 87.0 | 77.9 | 82.5 | 80.3 | 78.0 | 80.5 | 80.4 | 100. | 0    |      |      |
| <i>S. pavanii</i> DSM 25135 <sup>T</sup>         | LDJN00000000 | 79.8 | 82.2 | 77.1 | 80.3 | 81.8 | 82.2 | 80.5 | 77.0 | 78.7 | 87.0 | 76.7 | 87.1 | 91.3 | 80.6 | 100. | 0    |      |
| <i>S. pictorum</i> JCM 9942 <sup>T</sup>         | LLXS00000000 | 82.4 | 78.7 | 77.5 | 83.2 | 79.9 | 78.8 | 83.1 | 77.4 | 83.0 | 79.1 | 77.6 | 79.0 | 79.6 | 83.7 | 79.2 | 100. | 0    |
| <i>S. rhizophila</i> JCM 13333 <sup>T</sup>      | CP007597     | 80.0 | 81.4 | 77.0 | 80.5 | 85.6 | 81.4 | 80.6 | 76.9 | 79.5 | 81.7 | 77.0 | 81.7 | 81.6 | 80.6 | 81.6 | 79.8 | 100. |

---











**Supplementary Table S6. Genetic features predicted from the genomes of strains CPCC 101365<sup>T</sup>, CPCC 101269<sup>T</sup>, and CPCC 101426 that may be potentially involved in plant growth-promotion and environmental stress tolerance. -, not detected.**

| Gene                                                | Enzyme code | Product                                      | CPCC 101365 <sup>T</sup>                                            | CPCC 101269 <sup>T</sup>                                                                                                  | CPCC 101426                                       |
|-----------------------------------------------------|-------------|----------------------------------------------|---------------------------------------------------------------------|---------------------------------------------------------------------------------------------------------------------------|---------------------------------------------------|
| <b><i>Biosynthesis of indole-3-acetic acid</i></b>  |             |                                              |                                                                     |                                                                                                                           |                                                   |
| <i>trpE</i>                                         | EC 4.1.3.27 | Anthranilate synthase component II           | K5L01_RS12200                                                       | H4O12_RS06550                                                                                                             | H4O09_RS01845                                     |
| <i>trpG</i>                                         | EC 4.1.3.27 | Anthranilate synthase component I            | K5L01_RS12210                                                       | H4O12_RS06555                                                                                                             | H4O09_RS01850                                     |
| <i>trpD</i>                                         | EC 2.4.2.18 | Anthranilate phosphoribosyltransferase       | K5L01_RS12185                                                       | H4O12_RS06545                                                                                                             | H4O09_RS01835                                     |
| <i>trpF</i>                                         | EC 5.3.1.24 | Phosphoribosylanthranilate isomerase         | K5L01_RS05645                                                       | H4O12_RS13755                                                                                                             | H4O09_RS07325                                     |
| <i>trpC</i>                                         | EC 4.1.1.48 | Indole-3-glycerol phosphate synthase         | K5L01_RS12180                                                       | H4O12_RS06540                                                                                                             | H4O09_RS01830                                     |
| <i>trpA</i>                                         | EC 4.2.1.20 | Tryptophan synthase subunit alpha            | K5L01_RS05625                                                       | H4O12_RS13770                                                                                                             | H4O09_RS07280                                     |
| <i>trpB</i>                                         | EC 4.2.1.20 | Tryptophan synthase subunit beta             | K5L01_RS05635                                                       | H4O12_RS13765                                                                                                             | H4O09_RS07290                                     |
|                                                     | EC 1.2.7.8  | Indolepyruvate ferredoxin oxidoreductase     | K5L01_RS14095                                                       | H4O12_RS08805                                                                                                             | -                                                 |
| <b><i>Production and uptake of siderophores</i></b> |             |                                              |                                                                     |                                                                                                                           |                                                   |
| <i>aroA</i>                                         | EC 2.5.1.19 | 3-phosphoshikimate 1-carboxyvinyltransferase | K5L01_RS04530                                                       | H4O12_RS02960                                                                                                             | H4O09_RS05170                                     |
| <i>aroC</i>                                         | EC 4.2.3.5  | Chorismate synthase                          | K5L01_RS05675                                                       | H4O12_RS13725                                                                                                             | H4O09_RS10235                                     |
| <i>aroQ</i>                                         | EC 5.4.99.5 | Gamma subclass chorismate mutase             | -                                                                   | H4O12_RS15100                                                                                                             | -                                                 |
| <i>pheA</i>                                         | EC 4.2.1.51 | Prephenate dehydratase                       | K5L01_RS04535                                                       | H4O12_RS02955                                                                                                             | H4O09_RS05165                                     |
| <i>tonB</i>                                         |             | TonB-dependent siderophore receptor          | K5L01_RS06265,<br>K5L01_RS09170,<br>K5L01_RS09675,<br>K5L01_RS04030 | H4O12_RS03035,<br>H4O12_RS03085,<br>H4O12_RS03135,<br>H4O12_RS04010,<br>H4O12_RS04930,<br>H4O12_RS08610,<br>H4O12_RS00795 | -                                                 |
|                                                     |             | TonB family protein                          | K5L01_RS04520,<br>K5L01_RS08370                                     | -                                                                                                                         | H4O09_RS12115,<br>H4O09_RS14025                   |
| <i>exbB</i>                                         |             | TonB-system energizer                        | K5L01_RS09450                                                       | H4O12_RS09260                                                                                                             | H4O09_RS03300                                     |
| <i>exbD</i>                                         |             | Biopolymer transporter                       | K5L01_RS09455,<br>K5L01_RS09460,<br>K5L01_RS09455                   | H4O12_RS01135,<br>H4O12_RS09250,<br>H4O12_RS09255                                                                         | H4O09_RS07115,<br>H4O09_RS03290,<br>H4O09_RS03295 |
| <i>tolA</i>                                         |             | Cell envelope integrity protein              | K5L01_RS01620                                                       | H4O12_RS11265                                                                                                             | H4O09_RS11665                                     |
| <i>tolQ</i>                                         |             | MotA/TolQ/ExbB proton channel family protein | K5L01_RS05475                                                       | H4O12_RS17900                                                                                                             | H4O09_RS07120                                     |
| <i>feoB</i>                                         |             | Ferrous iron transporter                     | K5L01_RS03155                                                       | H4O12_RS16055                                                                                                             | H4O09_RS06280                                     |

|             |                                              |                                                                     |                                 |               |
|-------------|----------------------------------------------|---------------------------------------------------------------------|---------------------------------|---------------|
| <i>ahpC</i> | Peroxiredoxin                                | -                                                                   | H4O12_RS12965                   | H4O09_RS00175 |
| <i>fiu</i>  | Catecholate siderophore receptor             | -                                                                   | H4O12_RS03715                   | -             |
| <i>bfr</i>  | Bacterioferritin                             | -                                                                   | H4O12_RS06475,<br>H4O12_RS00590 | H4O09_RS01770 |
| <i>fecR</i> | periplasmic ferric-dicitrate binding protein | K5L01_RS01055,<br>K5L01_RS02360,<br>K5L01_RS05375,<br>K5L01_RS12910 | -                               | H4O09_RS10730 |

---

**Supplementary Table S7. Genes related to heat shock and suicide mechanisms predicted from the genomes of strains CPCC 101365<sup>T</sup>, CPCC 101269<sup>T</sup>, CPCC 101442, *S. maltophilia* K279a, and *S. maltophilia* DSM 50170<sup>T</sup>.**

| Gene        | Product                        | Biological role                                                     | CPCC 101365 <sup>T</sup> | CPCC 101269 <sup>T</sup> | CPCC 101426   | <i>S. maltophilia</i> K279a | <i>S. maltophilia</i> DSM 50170 <sup>T</sup> |
|-------------|--------------------------------|---------------------------------------------------------------------|--------------------------|--------------------------|---------------|-----------------------------|----------------------------------------------|
| <i>rpoH</i> | Sigma 32                       | Heat shock sigma factor                                             | K5L01_RS12545            | H4O12_RS06290            | H4O09_RS09420 | SMLT_RS20270                | CKW06_RS21085                                |
| <i>dnaJ</i> | Chaperone DnaJ                 | Stress response                                                     | K5L01_RS02800            | H4O12_RS02310            | H4O09_RS04855 | SMLT_RS09635                | CKW06_RS10350                                |
| <i>dnaK</i> | Chaperone DnaK                 | Stress response                                                     | K5L01_RS02795            | H4O12_RS02305            | H4O09_RS04850 | SMLT_RS09630                | CKW06_RS10345                                |
| <i>grpE</i> | Chaperone complex protein      | Prevents the aggregation of stress-denatured proteins               | K5L01_RS02790            | H4O12_RS02300            | H4O09_RS04845 | SMLT_RS09625                | CKW06_RS10340                                |
| <i>groL</i> | Chaperonin GroEL               | Heat shock chaperone                                                | K5L01_RS09590            | H4O12_RS06075            | H4O09_RS01565 | SMLT_RS20060                | CKW06_RS20875                                |
| <i>htpG</i> | Heat shock chaperone           | Heat shock response                                                 | K5L01_RS03590            | H4O12_RS01760            | H4O09_RS05765 | SMLT_RS08735                | CKW06_RS09760                                |
| <i>clpA</i> | ATPase with chaperone activity | Stress response                                                     | K5L01_RS04170            | H4O12_RS04830            | H4O09_RS13075 | SMLT_RS11235                | CKW06_RS11950                                |
| <i>hslV</i> | Protease                       | Degradation of abnormal/stress-denatured proteins                   | K5L01_RS10195            | H4O12_RS14930            | H4O09_RS09155 | SMLT_RS19390                | CKW06_RS20190                                |
| <i>htpX</i> | Protease                       | Degradation of abnormal/stress-denatured proteins due to heat shock | K5L01_RS05205            | H4O12_RS14930            | H4O09_RS13225 | SMLT_RS15810                | CKW06_RS16180                                |

|            |                   |                                                   |                                 |                                 |                                 |                                                                                  |                                                                     |
|------------|-------------------|---------------------------------------------------|---------------------------------|---------------------------------|---------------------------------|----------------------------------------------------------------------------------|---------------------------------------------------------------------|
| <i>lon</i> | Lon Protease      | Degradation of abnormal/stress-denatured proteins | K5L01_RS07160                   | H4O12_RS11945                   | H4O09_RS14160                   | SMLT_RS04765                                                                     | CKW06_RS04660                                                       |
|            | Killer protein    | Suicide mechanism                                 | K5L01_RS05285                   | H4O12_RS11850                   | -                               | SMLT_RS06410,<br>SMLT_RS17165,<br>SMLT_RS20265,<br>SMLT_RS00305,<br>SMLT_RS01585 | CKW06_RS17925,<br>CKW06_RS21080,<br>CKW06_RS00205,<br>CKW06_RS01455 |
|            | Entericidin EcnAB | Suicide mechanism                                 | K5L01_RS08140,<br>K5L01_RS08145 | H4O12_RS08170,<br>H4O12_RS08175 | H4O09_RS10945,<br>H4O09_RS10950 | SMLT_RS01620                                                                     | CKW06_RS17925                                                       |
